# Supplementary material
Source: PubMed Central journal article supplement (PMC3914002)
Supplement: NIHMS543737-supplement-Supplemental_Material.pdf [file NIHMS543737-supplement-Supplemental_Material.pdf]

Supplemental Material for:

**Bacterial discrimination by Dictyostelid amoebae reveals the complexity of ancient interspecies interactions**

Waleed Nasser<sup>1</sup>, Balaji Santhanam<sup>2,3</sup>, Edward Roshan Miranda<sup>2,4</sup>, Anup Parikh<sup>2,3</sup>, Kavina Juneja<sup>5</sup>, Gregor Rot<sup>6</sup>, Chris Dinh<sup>1</sup>, Rui Chen<sup>2,3,4</sup>, Blaz Zupan<sup>2,6</sup>, Gad Shaulsky<sup>2,3,4</sup> and Adam Kuspa<sup>1,2,4\*</sup>

1 - Verna and Marrs McLean Department of Biochemistry and Molecular Biology, 2 – Department of Molecular and Human Genetics, 3 – Structural and Computational Biology and Molecular Biophysics Program, 4 – Developmental Biology Program, Baylor College of Medicine, Houston, TX 77030; 5 – Department of Biochemistry and Cell Biology, Rice University, Houston, TX 77005; 6 – Faculty of Computer and Information Science, University of Ljubljana, Slovenia.

\* Corresponding author:

Adam Kuspa, Ph.D.  
Department of Biochemistry and Molecular Biology  
Baylor College of Medicine  
One Baylor Plaza  
Houston, TX 77030  
Phone: 713-798-1060  
E-mail: [akuspa@bcm.edu](mailto:akuspa@bcm.edu)

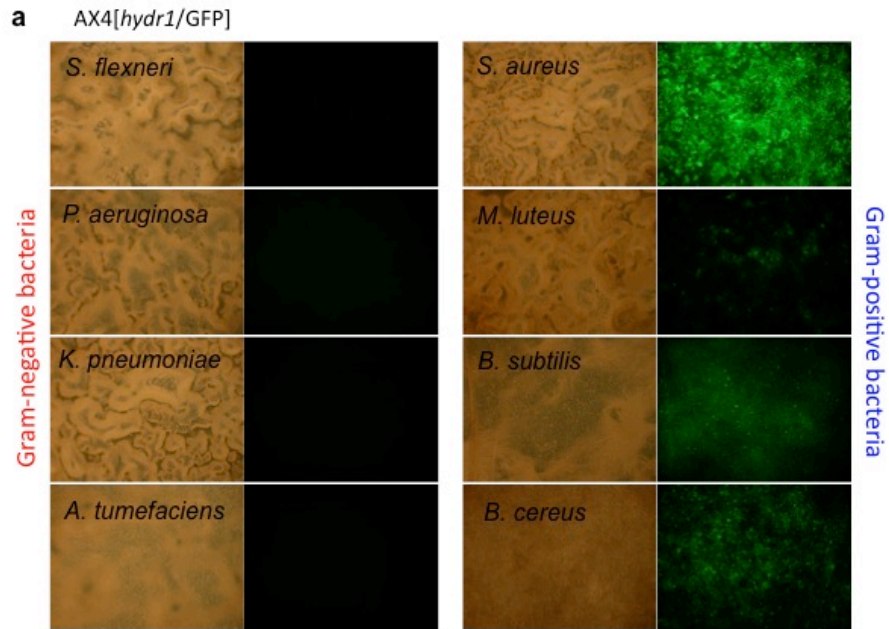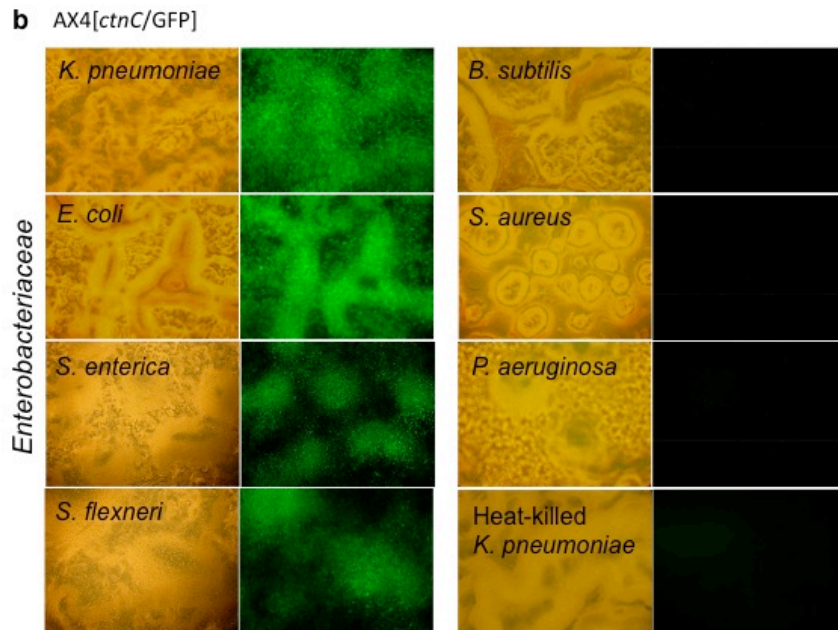

**Figure S1. a**, Wild-type (AX4) amoebae transformed with green fluorescent protein (GFP) coding sequence placed under the control of the *hydr1* (*DDB\_G0293366*) promoter, a Gram-positive specific gene, AX4[*hydr1*/GFP], were mixed with different bacteria and spotted on buffered agar. The amoebae produce GFP and fluoresce when exposed to Gram-positive bacteria, but not when exposed to Gram-negative bacteria. Pictures depict bright-field and fluorescent microscopy using a 10X objective lens. **b**, Wild-type amoebae transformed with GFP placed under the control of *ctnC* promoter, AX4[*ctnC*/GFP], were mixed with different bacteria and spotted on buffered agar. The amoebae produce GFP and fluoresce when exposed to *Enterobacteriaceae* family bacteria, but not when exposed to heat-killed *Enterobacteriaceae*, or any other bacteria we tested.

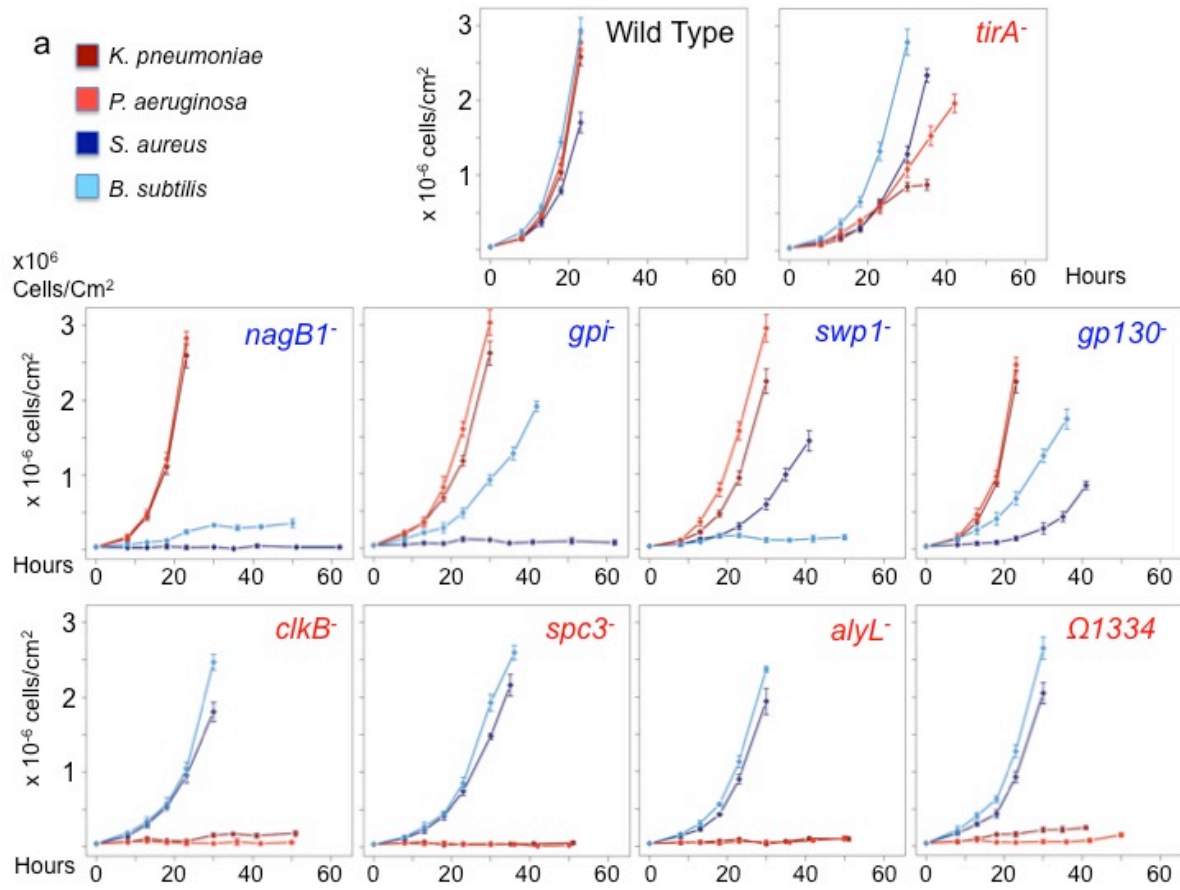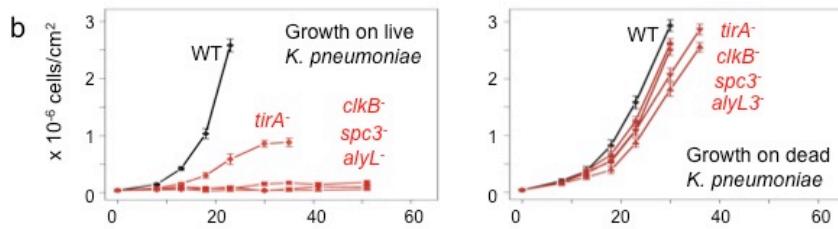

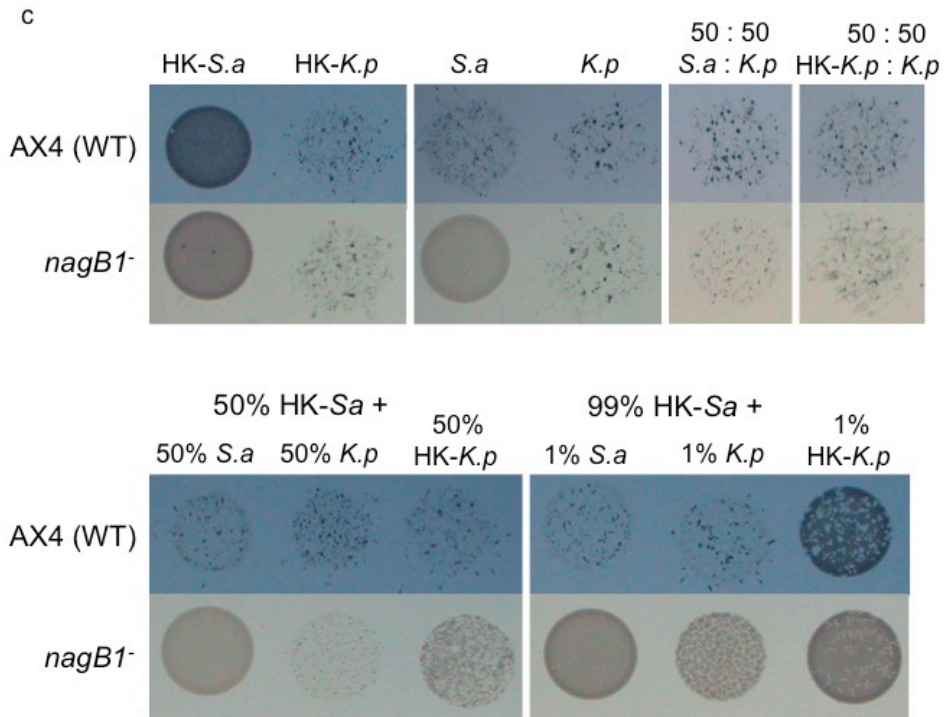

**Figure S2. Growth of *D. discoideum* strains under different bacterial growth conditions.**

**a**, Growth curves of wild-type AX4 (WT) and mutant *D. discoideum* strains on four bacteria, *K. pneumoniae*, *P. aeruginosa*, *S. aureus*, and *B. subtilis*. *D. discoideum* strains (WT, *tirA*<sup>-</sup>, *nagB1*<sup>-</sup>, *gpi*<sup>-</sup>, *swp1*<sup>-</sup>, *gp130*<sup>-</sup>, *clkB*<sup>-</sup>, *spc3*<sup>-</sup>, *alyL*<sup>-</sup>, and Ω1334) were mixed with a thick bacterial culture and plated on buffered agar. *D. discoideum* growth was monitored by counting cells in a fixed surface area. **b**, Growth curve of WT and Gram(-) growth defective mutants on live bacteria (left) and heat-killed bacteria (right). WT and Gram(-) defective mutants exhibit similar growth phenotype on heat-killed Gram(-) bacteria. **c**, *D. discoideum* growth on heat-killed *S. aureus*. Rows represent wild type or *nagB1*<sup>-</sup> mutant amoeba as indicated on left, and columns represent different bacterial species or a mixture of bacterial species (heat-killed or live) in different mass ratios as indicated (HK, heat-killed; *S.a*, *S. aureus*; *K.p*, *K. pneumoniae*). Each spot is a co-culture of about 500 *D. discoideum* cells and a thick bacterial culture spotted on buffered agar and imaged after 4 days of incubation. The bacteria appear as tan areas within the spots. The dark speckles within the spots are a result of *Dictyostelium* aggregation and multicellular development following exhaustion of the bacterial food supply. Intermediate levels of feeding are indicated by partial clearing of the tan bacteria lawn. Similar results were obtained for the other Gram(+)-growth-defective mutants *gpi*<sup>-</sup> and *swp1*<sup>-</sup> (unpublished observations).

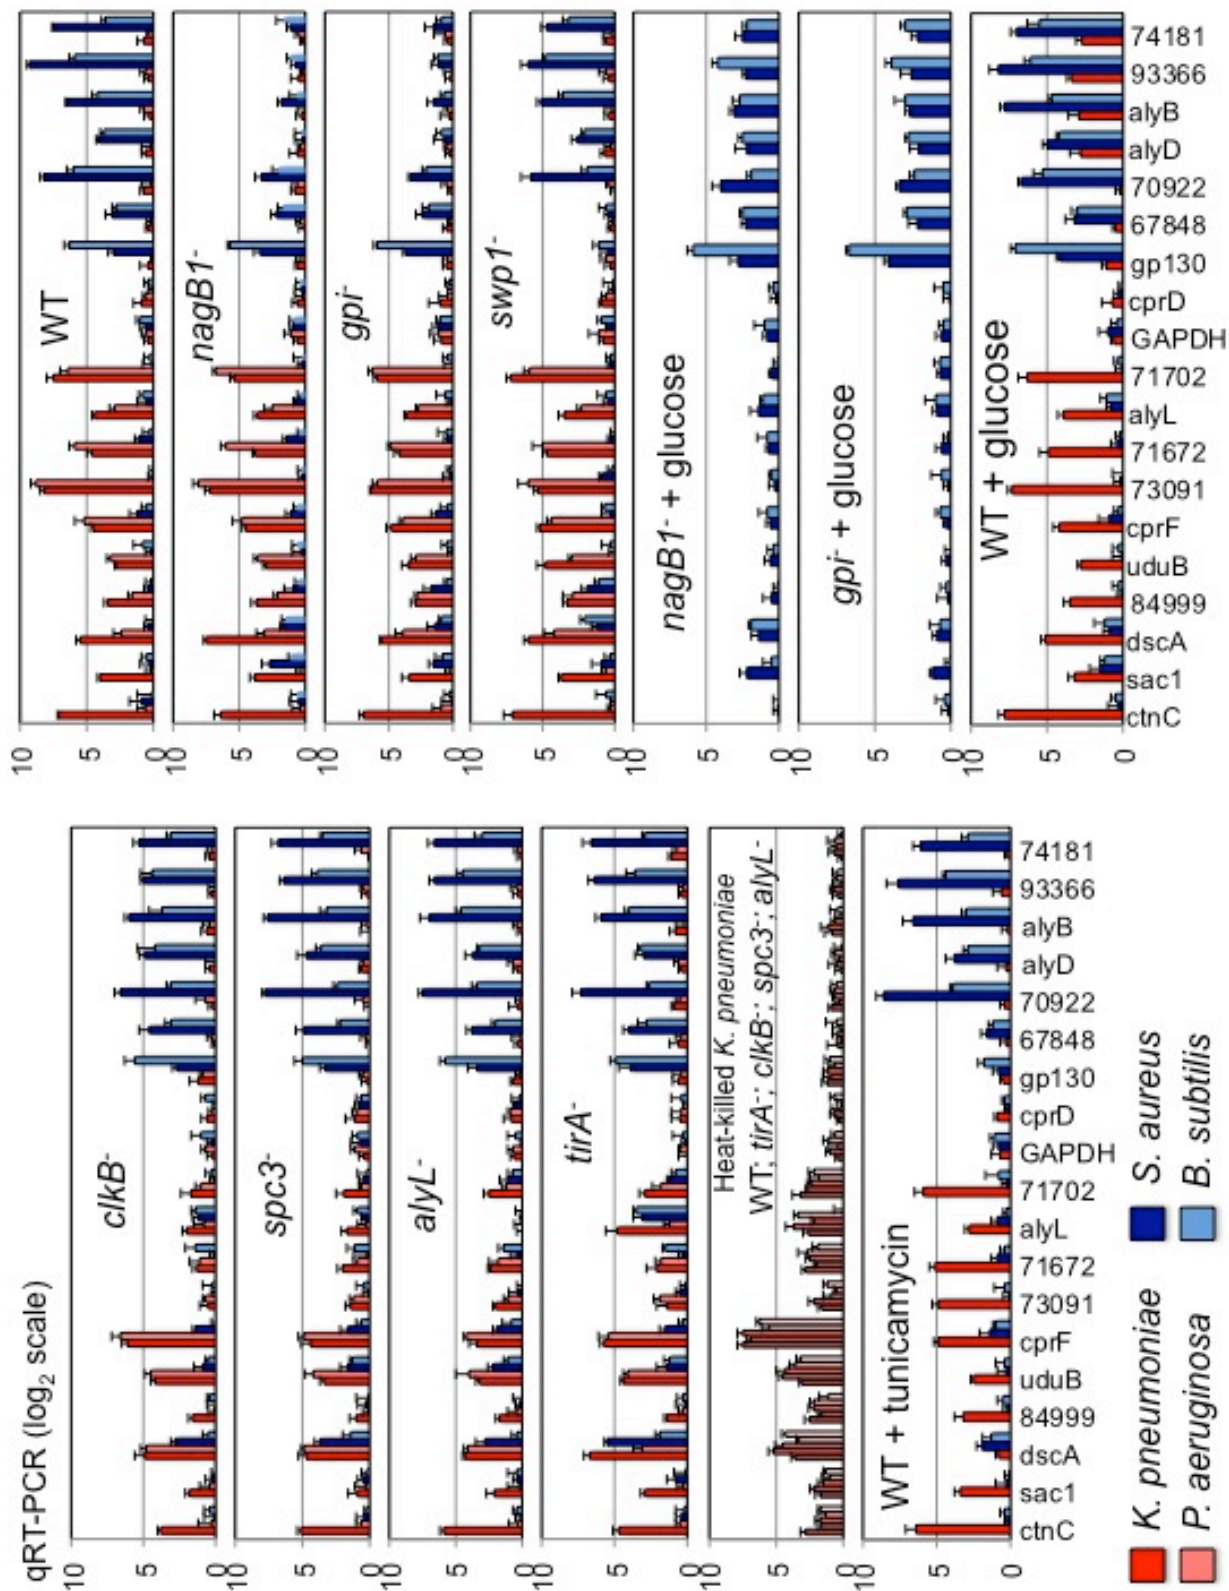

**Figure S3. Expression (qRT-PCR) analysis of marker gene transcripts of *D. discoideum***

**strains under different bacterial growth conditions.** *D. discoideum* strains WT, *nagBI*<sup>-</sup>, *gpi*<sup>-</sup>,

*swpI*<sup>-</sup>, *tirA*<sup>-</sup>, *clkB*<sup>-</sup>, *spc3*<sup>-</sup>, and *alyL*<sup>-</sup> were mixed with *K. pneumoniae*, *P. aeruginosa*, *S. aureus*,

and *B. subtilis*. WT amoebae were also mixed with *K. pneumoniae*, *S. aureus*, or *B. subtilis* in the

presence of tunicamycin or glucose. The *nagBI*<sup>-</sup> and *gpi*<sup>-</sup> mutants were also mixed with *S.*

*aureus*, and *B. subtilis* in the presence of glucose, and WT, *tirA*<sup>-</sup>, *clkB*<sup>-</sup>, *spc3*<sup>-</sup>, and *alyL*<sup>-</sup> were

mixed with Heat-killed *K. pneumoniae*. Relative mRNA levels were determined by qRT-PCR,

using the gene specific primers (Supplemental Table S4) and normalizing them to the transcript

levels of the histone H3a gene within each sample. Some of the genes are identified by the last

five digits of their DDB\_G number as annotated on dictyBase [1]. The full gene names can be

reconstructed by adding the 5-digit number to the end of “DDB\_G02”.

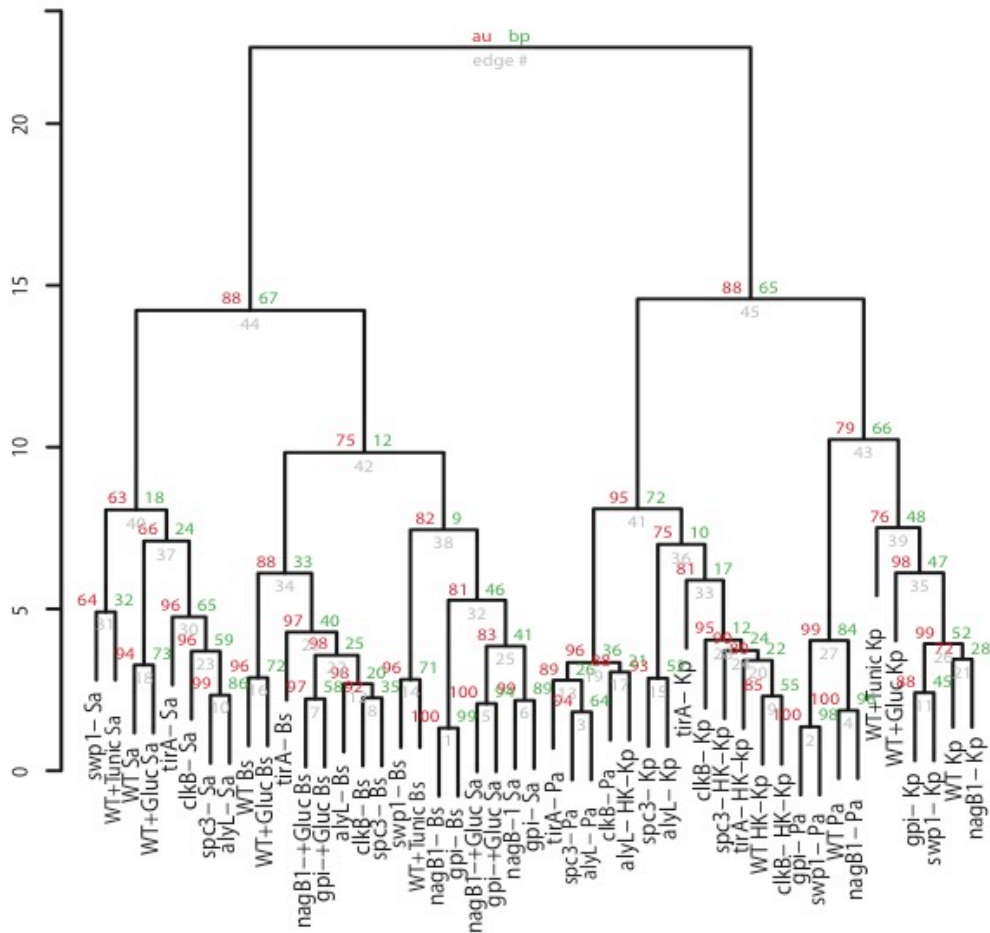

**Figure S4. Hierarchical clustering of transcriptomes from *D. discoideum* strains under different bacterial growth conditions.** Hierarchical clustering with multiscale bootstrap resampling (R package pvclust) of normalized mRNA levels of marker genes in wild-type (WT) or mutant (*nagB1*<sup>-</sup>, *gpi*<sup>-</sup>, *swp1*<sup>-</sup>, *tirA*<sup>-</sup>, *clkB*<sup>-</sup>, *spc3*<sup>-</sup>, *alyL*<sup>-</sup>) *D. discoideum* strains grown on different bacterial species [*K. pneumoniae* (*K.p*), Heat-killed *K. pneumoniae* (HK-*K.p*), *P. aeruginosa* (*P.a*), *S. aureus* (*S.a*), or *B. subtilis* (*B.s*)]. Approximately unbiased *p*-values (au) and the bootstrap probabilities (bp) are shown for each branch, in red and green respectively [2]. The distances depicted are Euclidean distances with arbitrary units.



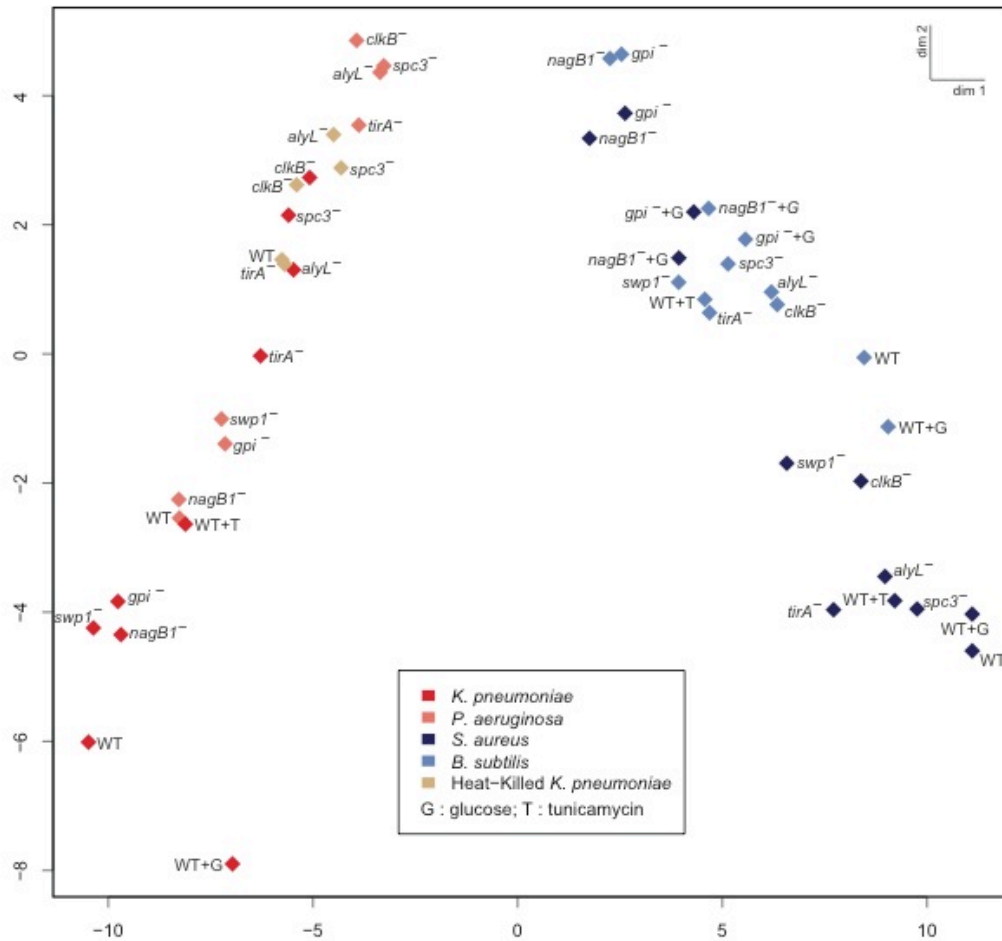

**Figure S5. Multidimensional scaling analysis of transcriptomes from *D. discoideum* strains under different bacterial growth conditions.** The same data set depicted in Figure S4 was subjected to classical multidimensional scaling (MDS) analysis (R function cmdscale) depicting the dissimilarities due to normalized mRNA levels of differentially expressed genes.

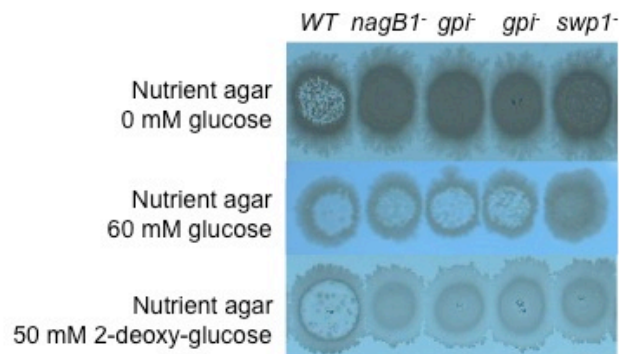

**Figure S6. Glucose rescues *nagB1*<sup>-</sup> and *gpi*<sup>-</sup> mutants growth on *B. subtilis*.**

Approximately 250 cells of AX4 wild-type (WT) *D. discoideum*, the *nagB1*<sup>-</sup> mutant (AK1372), two different *gpi*<sup>-</sup> mutant strains (AK1333 and AK1353), and the *swp1*<sup>-</sup> mutant (AK1321) mixed with an overnight culture of *B. subtilis* and spotted on Nutrient agar with no glucose added, 60 mM glucose, or 50 mM 2-deoxy-glucose. The images were acquired 4 days after plating.

Glucose treatment rescued the growth phenotype of the *nagB1*<sup>-</sup> and *gpi*<sup>-</sup> mutants on *B. subtilis*, as indicated by the central clearing of the spots, but not the growth of the *swp1* mutant.

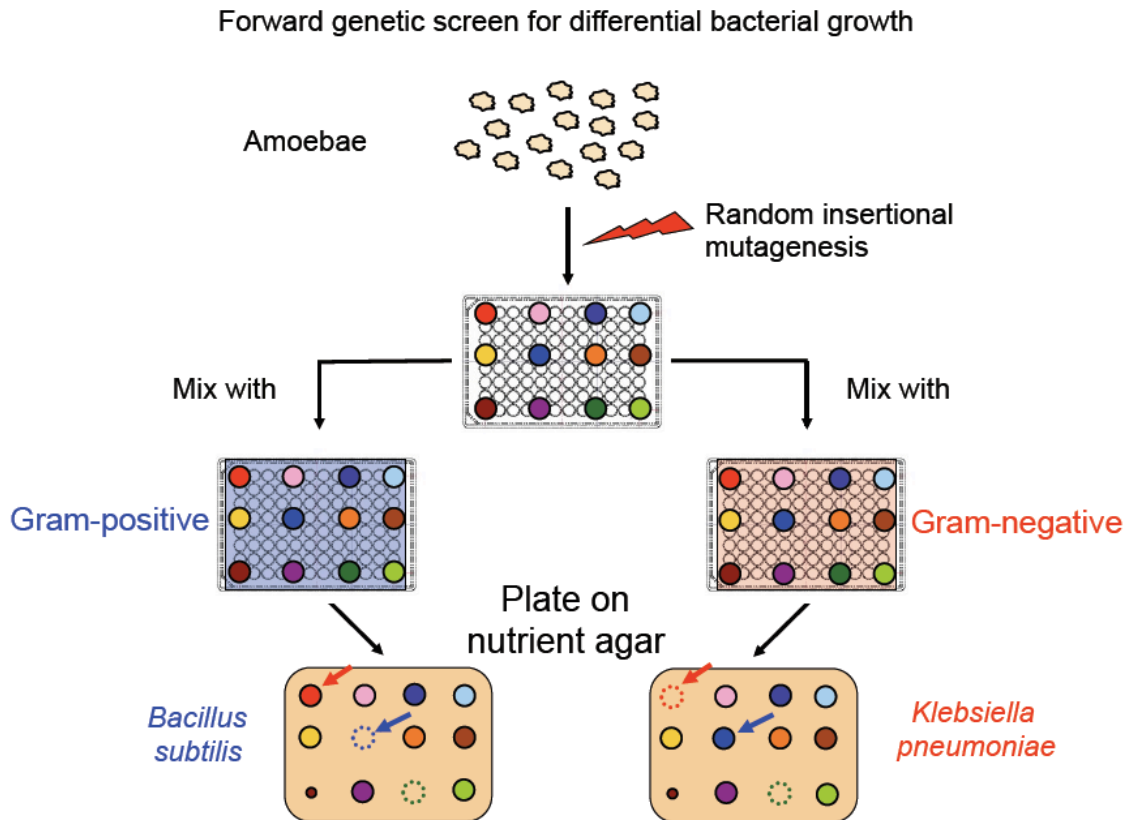

**Figure S7. Scheme for the forward genetic screen to isolate mutants with a differential growth phenotype on bacteria.** We subjected cultures of AX4 amoebae to plasmid insertional-mutagenesis using REMI [3] and plated for clonal growth in liquid media. Wells with transformed mutants colonies were consolidated into 96-well plates and the amoebae were allowed to grow to saturation. We mixed about 150-200 mutant cells with a slurry of Gram(+) *B. subtilis* bacteria and separately with a slurry of Gram(-) *K. pneumoniae* bacteria. We spotted the amoebae-bacteria mixtures onto Nutrient media agar and monitored amoebal growth over five days. We picked mutants that displayed differential growth on the two bacteria (red or blue arrows), as well as those that showed slower or more rapid growth.

**Supplemental Table S1 (separate file).** An Excel spreadsheet containing the raw and processed RNAseq data used in this study.

**Supplemental Table S2. *D. discoideum* strains used in this study.**

| Strain | Gene mutated        | Growth Phenotype on Bacteria <sup>1</sup> | Annotation and Notes <sup>2</sup>                                                                       | Reference |
|--------|---------------------|-------------------------------------------|---------------------------------------------------------------------------------------------------------|-----------|
| AX4    | <i>axeA, axeB</i>   | wild-type                                 | Parental axenix strain for mutants generated in this study                                              | [4]       |
| 1C7    | <i>gp130</i>        | Gram(+)-defective                         | gp130 adhesion protein                                                                                  | [5]       |
| 2F5    | <i>gp130</i>        | Gram(+)-defective                         | gp130 adhesion protein                                                                                  | [5]       |
| AK1321 | <i>swp1</i>         | Gram(+)-defective                         | oligosaccharide transferase                                                                             | This work |
| AK1333 | <i>gpi</i>          | Gram(+)-defective                         | glucose phosphate isomerase                                                                             | This work |
| AK1353 | <i>gpi</i>          | Gram(+)-defective                         | glucose phosphate isomerase                                                                             | This work |
| AK1372 | <i>nagB1</i>        | Gram(+)-defective                         | glucosamine-6-phosphate deaminase                                                                       | This work |
| AK1336 | <i>DDB_G0291279</i> | Gram(+)-defective                         | putative 11-transmembrane-domain transporter                                                            | This work |
| AK1339 | <i>iliE-1</i>       | Gram(+)-defective                         | lectin-like                                                                                             | This work |
| AK1334 | unknown             | Gram(-)-defective                         | insertion between two genes, DDB_G0295477/<br>DDB_G0271574, and upstream of putative noncoding-RNA gene | This work |
| AK1338 | <i>clkB</i>         | Gram(-)-defective                         | CDC7-related protein kinase DDB_G0278487                                                                | This work |
| AK1346 | <i>spc3</i>         | Gram(-)-defective                         | signal peptidase complex subunit 3                                                                      | This work |
| AK1350 | <i>alyL</i>         | Gram(-)-defective                         | amoeba lysozyme-like                                                                                    | This work |
| AK1303 | <i>DDB_G0276559</i> | Gram(-)-defective                         | novel uncharacterized protein                                                                           | This work |
| AK1319 | <i>DDB_G0288161</i> | Fast growth                               | novel uncharacterized protein                                                                           | This work |
| AK1320 | <i>DDB_G0281785</i> | Fast growth                               | B-box zinc finger binding, and FNIP repeats                                                             | This work |
| AK1302 | <i>rbsK</i>         | No growth                                 | D-ribose metabolism                                                                                     | This work |
| AK1301 | <i>DDB_G0277169</i> | Slow growth                               | novel uncharacterized protein                                                                           | This work |
| AK1304 | <i>pakB</i>         | Slow growth                               | phagocytosis regulator                                                                                  | This work |
| AK1305 | <i>DDB_G0292196</i> | Slow growth                               | novel uncharacterized protein                                                                           | This work |
| AK1306 | <i>DDB_G0270300</i> | Slow growth                               | novel uncharacterized protein                                                                           | This work |
| AK1307 | <i>DDB_G0284227</i> | Slow growth                               | nucleic acid binding and nuclease activity                                                              | This work |
| AK1309 | <i>DDB_G0277667</i> | Slow growth                               | cyclin domain containing protein                                                                        | This work |
| AK1311 | <i>pelo</i>         | Slow growth                               | translation factor                                                                                      | This work |
| AK1313 | <i>DDB_G0293440</i> | Slow growth                               | methyl transferase                                                                                      | This work |
| AK1315 | <i>DDB_G0281967</i> | Slow growth                               | novel uncharacterized cell surface protein                                                              | This work |
| AK1316 | <i>DDB_G0288459</i> | Slow growth                               | transglutaminase-like protein                                                                           | This work |
| AK1327 | <i>shkA</i>         | Slow growth                               | <b>SH2</b> domain-containing kinase                                                                     | This work |
| AK1331 | <i>arpF</i>         | Slow growth                               | <b>actin</b> related protein 6                                                                          | This work |
| AK1332 | <i>DDB_G0281447</i> | Slow growth                               | 2 transmembrane domains                                                                                 | This work |
| AK1335 | <i>DDB_G0285803</i> | Slow growth                               | Putative acetyltransferase                                                                              | This work |
| AK1337 | <i>dhcA</i>         | Slow growth                               | cytoplasmic <b>dynein heavy chain</b>                                                                   | This work |
| AK1340 | <i>DDB_G0269608</i> | Slow growth                               | Novel uncharacterized protein                                                                           | This work |
| AK1341 | <i>DDB_G0276277</i> | Slow growth                               | Putative oxidoreductase                                                                                 | This work |

|        |                     |             |                                             |           |
|--------|---------------------|-------------|---------------------------------------------|-----------|
| AK1342 | <i>DDB_G0272382</i> | Slow growth | PH and Phox domains                         | This work |
| AK1343 | <i>DDB_G0292054</i> | Slow growth | Carbohydrate-binding                        | This work |
| AK1345 | <i>DDB_G0293476</i> | Slow growth | Thrombospondin type 3 repeat                | This work |
| AK1348 | <i>qtrt1</i>        | Slow growth | <b>Queuine tRNA-ribosylTransferase 1</b>    | This work |
| AK1371 | <i>empB</i>         | Slow growth | component of COPI-coated vesicles           | This work |
| AK1373 | <i>elp4</i>         | Slow growth | RNA polymerase II elongation complex        | This work |
| AK1374 | <i>cct3</i>         | Slow growth | <b>Chaperonin Containing TCP1 subunit 3</b> | This work |
| AK1362 | <i>DDB_G0279939</i> | Slow growth | Novel uncharacterized protein               | This work |

**Table S3. Bacterial strains used in this study.**

| <b>Bacterial species</b><br>(isolate)                    | <b>Phylum, Class, Order</b>                                              | <b>Source</b>                                             |
|----------------------------------------------------------|--------------------------------------------------------------------------|-----------------------------------------------------------|
| <i>Klebsiella pneumoniae</i><br>(Environmental)          | <i>Proteobacteria, Gamma</i><br><i>Proteobacteria, Enterobacteriales</i> | Kuspa Lab (Baylor College of Medicine)                    |
| <i>Bacillus subtilis</i> AG1431<br>(Environmental)       | <i>Firmicutes, Bacilli, Bacillales</i>                                   | Jue D. Wang (University of Wisconsin, Madison WI)         |
| <i>Pseudomonas aeruginosa</i> H45006<br>(Clinical)       | <i>Proteobacteria, Gamma</i><br><i>Proteobacteria, Pseudomonadales</i>   | James Versalovic (Baylor College of Medicine, Houston TX) |
| <i>Staphylococcus aureus</i> ATCC 49230<br>(Clinical)    | <i>Firmicutes, Bacilli, Bacillales</i>                                   | Heidi Kaplan (University of Texas, Houston TX)            |
| <i>Pseudomonas fluorescens</i> WC5365<br>(Environmental) | <i>Proteobacteria, Gamma</i><br><i>Proteobacteria, Pseudomonadales</i>   | Elizabeth Ostrowski (University of Houston, Houston TX)   |
| <i>Pseudomonas fluorescens</i> f-01<br>(Environmental)   | <i>Proteobacteria, Gamma</i><br><i>Proteobacteria, Pseudomonadales</i>   | Elizabeth Ostrowski (University of Houston, Houston TX)   |
| <i>Pseudomonas fluorescens</i> f-05<br>(Environmental)   | <i>Proteobacteria, Gamma</i><br><i>Proteobacteria, Pseudomonadales</i>   | Elizabeth Ostrowski (University of Houston, Houston TX)   |
| <i>Pseudomonas stutzeri</i> W47237-W1<br>(Clinical)      | <i>Proteobacteria, Gamma</i><br><i>Proteobacteria, Pseudomonadales</i>   | James Versalovic (Baylor College of Medicine, Houston TX) |
| <i>Bacillus cereus</i> ATCC 10987<br>(Clinical)          | <i>Firmicutes, Bacilli, Bacillales</i>                                   | Anthony Maresso (Baylor College of Medicine, Houston TX)  |
| <i>Bacillus anthracis</i> Sterne<br>(Environmental)      | <i>Firmicutes, Bacilli, Bacillales</i>                                   | Anthony Maresso (Baylor College of Medicine, Houston TX)  |
| <i>Agrobacterium tumefaciens</i> A348<br>(Environmental) | <i>Proteobacteria, Alphaproteobacteria,</i><br><i>Rhizobiales</i>        | Heidi Kaplan (University of Texas, Houston)               |
| <i>Escherichia coli</i> B rel 606<br>(Environmental)     | <i>Proteobacteria, Gamma</i><br><i>Proteobacteria, Enterobacteriales</i> | Elizabeth Ostrowski (University of Houston, Houston TX)   |
| <i>Salmonella enterica</i> ATCC 14028<br>(Clinical)      | <i>Proteobacteria, Gamma</i><br><i>Proteobacteria, Enterobacteriales</i> | Herbert DuPont (University of Texas, Houston)             |
| <i>Shigella flexneri</i> ATCC 12022<br>(Clinical)        | <i>Proteobacteria, Gamma</i><br><i>Proteobacteria, Enterobacteriales</i> | Herbert DuPont (University of Texas, Houston)             |
| <i>Micrococcus luteus</i><br>(Environmental)             | <i>Actinobacteria, Actinobacteridae,</i><br><i>Actinomycetales</i>       | Peter Newell (deposited at dictyBase stock center)        |
| <i>Enterococcus faecalis</i> OGRIF<br>(Clinical)         | <i>Firmicutes, Bacilli, Lactobacillales</i>                              | Danielle Garsin (University of Texas, Houston)            |

Bacterial species were classified according to their taxonomy (NCBI taxonomy website).

**Supplement Table S4. Primers used for qRT-PCR transcriptional profile analysis.**

| DDB_G number | Gene name                           | Forward primer (5'-3')             | Reverse primer (5'-3')              |
|--------------|-------------------------------------|------------------------------------|-------------------------------------|
| 0267402      | <i>H3a</i>                          | GGTCTAAACAAGCCCATAAACA             | CTCTAAGAGCGACAGTAC                  |
| 0275153      | <i>gpdA</i>                         | GGTTGTCCCAATTTGGTATTAATGG          | CCGTGGGTGAATCATATTTGAAC             |
| 0278721      | <i>cprD</i>                         | TCAAACCTCTGCTTCTGGTCA              | AGAAGCCATTGTTGCGATACCA              |
| 0276479      | <i>ctnC</i>                         | TCAAAAAGTTATGTCATCAAGCGAAGAA<br>TG | TCCATAAAACCATTAATTTCCAAC TGCA<br>TC |
| 0268848      | <i>DDB_G0268848</i>                 | TCACTAGTCTCAACTCCATCAAC            | AGATTTATCAAACTAGTGACATCAGT<br>TTCAG |
| 0273063      | <i>dscA-1</i>                       | TCCACACTCAATTTAATTCTGCCT           | TGTATGATGTAACCCATTGATCAG            |
| 0284999      | <i>DDB_G0284999</i>                 | AGAATGCTGAAAAGTTCACTGAAGCT         | TGGAGCGATTTCTTGTAATGCTTC            |
| 0268600      | <i>uduB</i>                         | ACCAGCAACCTCTGATCCA                | TCTGTTGGCTGGTTCAGAG                 |
| 0279185      | <i>cprF</i>                         | TCAATCTCAAGGTTCCAATAGTTTCAC        | TGTAACCATTAAATACCCAGTCAAG           |
| 0273091      | <i>DDB_G0273091</i>                 | AGAACATGATCATGACCATGAAGAAG         | TGAGTGGCAACAATTGGAATAACTG           |
| 0271672      | <i>DDB_G0271672</i>                 | TGTCACGCTCCAAGTGGT                 | TGATGGAATGCTAATGCAACTAATAAA<br>GCT  |
| 0286229      | <i>alyL</i>                         | ACCAAGTTTTTCGCTACTTGTGTTAG         | AGAGATCCTCGCAAACTTTTGTGTTG          |
| 0271702      | <i>DDB_G0271702</i>                 | TCTCTGGTCCAGGTTGTTC                | ACTGAAACTTTTTGAGAGTCTGGAAG          |
| 0279921      | <i>gp130</i>                        | TGGTAGTATACCAGAAGGGTATTTG          | AGTTTCACAATTGGTTGGTAATGATTT<br>TTC  |
| 0267848      | <i>DDB_G0267848</i>                 | GGTCTTATGGATACTGTAACGGT            | TGTTCAACAGTGATAAGACCAGTTG           |
| 0270922      | <i>DDB_G0270922</i>                 | TGTTTCTGGGATGGTAAGGTTTG            | TCATTGTGGATTGATGAACAATGGACT         |
| 0275119      | <i>alyD-1</i>                       | AGGTCTGCAGGTACCTCA                 | ACAAACACCATAGAAACCTCCAGT            |
| 0275119      | <i>alyB</i>                         | AGTTCCATCATGCAGTGGTGCT             | AGTGAGAGAAGTAACAGTGGCA              |
| 0293366      | <i>hydr1</i><br><i>DDB_G0293366</i> | ACGCAACTTGTGGTTGTCCA               | ACCACTACATGCGGTACCT                 |
| 0274181      | <i>hydr2</i><br><i>DDB_G0274181</i> | TGCTCATATCGGTGTTTACACATC           | ACAGCTGTCACCAGTGTC                  |

## References

1. dictybase.org (2012).
2. Suzuki, R., and Shimodaira, H. (2006). pvcLust: Hierarchical Clustering with P-Values via Multiscale Bootstrap Resampling.
3. Kuspa, A., and Loomis, W.F. (1992). Tagging developmental genes in Dictyostelium by restriction enzyme-mediated integration of plasmid DNA. Proc. Natl. Acad. Sci. USA 89, 8803-8807.
4. Knecht, D.A., Cohen, S.M., Loomis, W.F., and Lodish, H.F. (1986). Developmental regulation of Dictyostelium discoideum actin gene fusions carried on low-copy and high-copy transformation vectors. Mol. Cell. Biol. 6, 3973-3983.
5. Chia, C.P., Gomathinayagam, S., Schmaltz, R.J., and Smoyer, L.K. (2005). Glycoprotein gp130 of dictyostelium discoideum influences macropinocytosis and adhesion. Mol Biol Cell 16, 2681-2693.
